# Supplementary material
Source: Springer Nature journal article supplement (https://www.springermedizin.de/resource/supplementary/12880_2014_237_MOESM1_ESM.pdf/9450302)

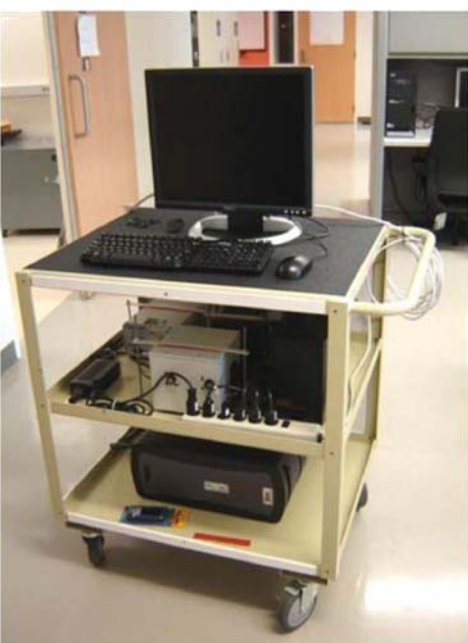

**a**

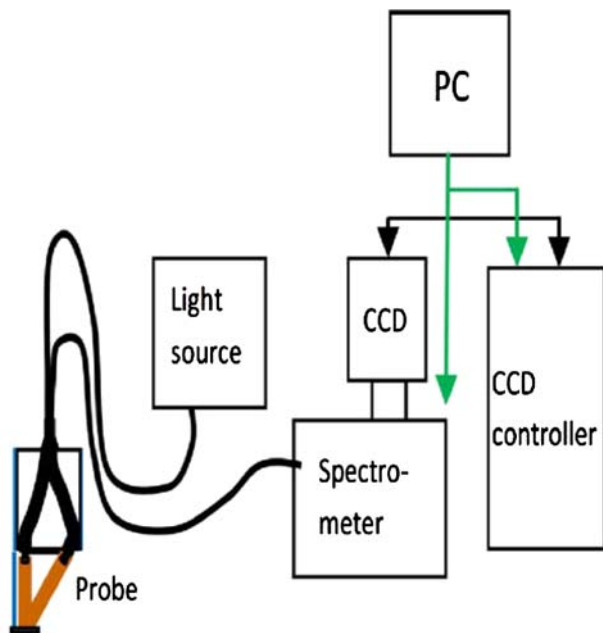

**c**

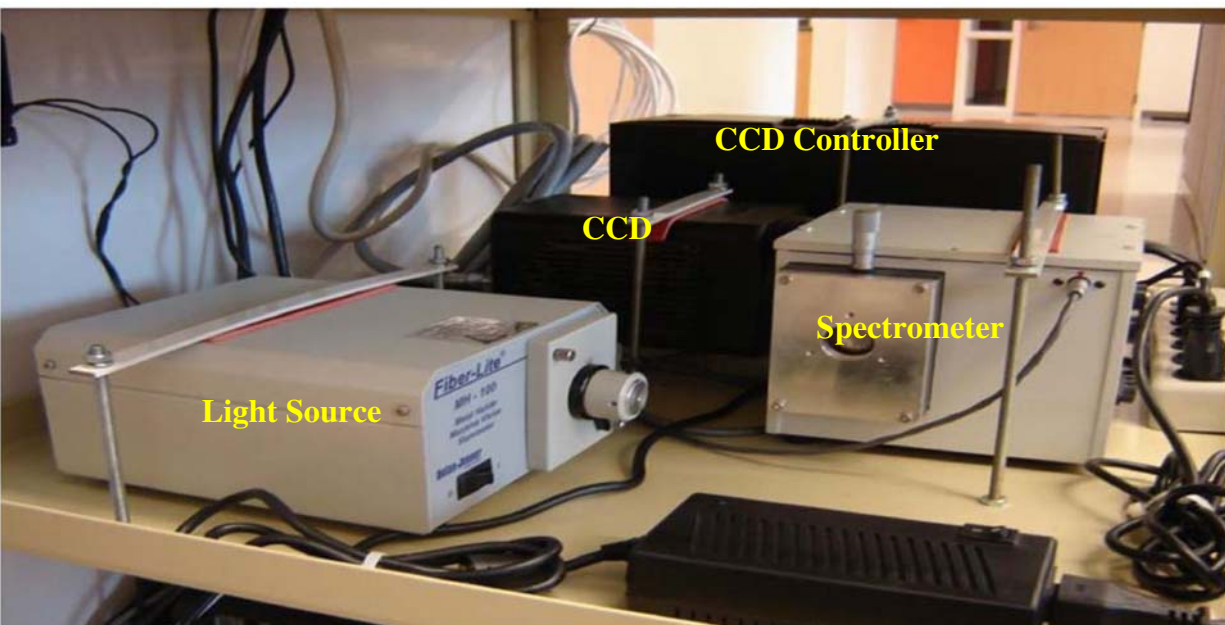

**b**

Supplement: MOESM1 [file 9450302]
